# Supplementary material for: Melatonin Reduces NLRP3 Inflammasome Activation by Increasing α7 nAChR-Mediated Autophagic Flux
Source: MDPI journal article supplement (doi:10.3390/antiox9121299), 2020-12-18
Supplement: s1 [file s1]

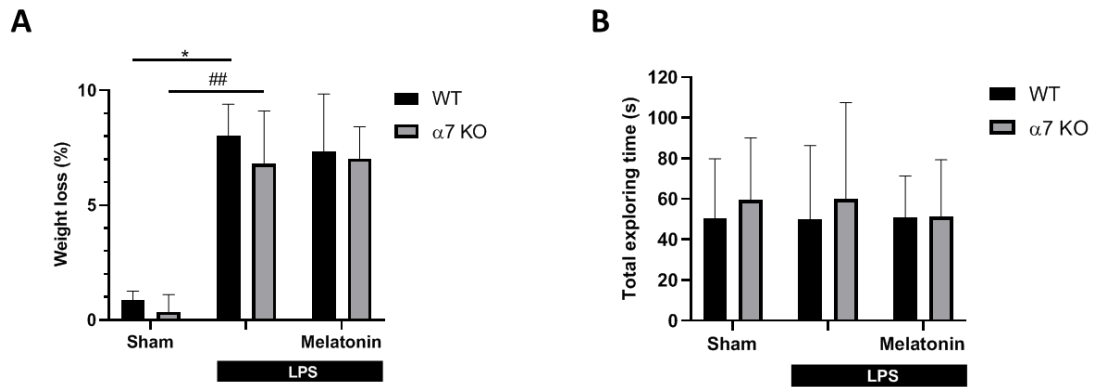

**Figure S1.** Loss of body weight and mobility of animals subjected to NOR test. **(A)** Animals were weighed before LPS injection and after NOR test (n = 7-8 per group). Percentage of body weight loss was calculated as follows: [(weight before injection – weight after NOR) / weight before injection  $\times$  100]. \* $p < 0.05$  vs LPS WT and ## $p < 0.01$  vs LPS  $\alpha 7$  nAChR KO. **(B)** Total exploring time of mice subjected to NOR test in both WT and  $\alpha 7$  nAChR KO groups (n = 7-8 per group).
